# Supplementary material for: Mitochondrial DNA genomes revealed different patterns of high-altitude adaptation in high-altitude Tajiks compared with Tibetans and Sherpas
Source: PubMed Central journal article supplement (PMC7324373; doi:10.1038/s41598-020-67519-z), 2020-06-29
Supplement: 41598_2020_67519_MOESM1_ESM.pdf [file 41598_2020_67519_MOESM1_ESM.pdf]

# **Mitochondrial DNA genomes revealed different patterns of high-altitude adaptation in high-altitude Tajiks compared with Tibetans and Sherpas**

Yu Chen<sup>1</sup>, Liang Gong<sup>1</sup>, Xinyuan Liu<sup>1</sup>, Xingshu Chen<sup>1</sup>, Shenghong Yang<sup>2#</sup>, Yongjun Luo<sup>1#</sup>

(1 Department of Military Medical Geography, Army Health Service Training Base, Third Military Medical University(Army Medical University), Chongqing 40038, China; 2 Health Department of the 957th Hospital of PLA, Ali, Tibet, China 859000)

#Corresponding author:

Prof. Shenghong Yang, Health Department of the 957th Hospital of PLA, Ali, Tibet, 859000, China.

(E-mail: kevinsh0751@163.com)

Prof. Yongjun Luo, Army Health Service Training Base, Third Military Medical University(Army Medical University), Chongqing 400038, China.

(E-mail: luo.yongjun@qq.com)

Table S1 Haplogroup of each subject in 80 HA-Tajiks

| Sample number | Haplogroup |
|---------------|------------|
| 101           | J1b6       |
| 102           | H6b2       |
| 104           | R0a        |
| 105           | H5b        |
| 106           | H6b2       |
| 107           | K1a12a     |
| 108           | U5a2b      |
| 109           | H20        |
| 110           | H14a       |
| 111           | R2         |
| 112           | M3a1b      |
| 113           | R2         |
| 114           | C4a1       |
| 115           | U5a1a1     |
| 116           | U5a2b      |
| 117           | T1a1n      |
| 118           | T2d1b      |
| 119           | B4c1a2     |
| 120           | H6b2       |
| 121           | T1a1n      |
| 122           | H5b        |
| 123           | U2b2       |
| 126           | J1b1a1     |
| 129           | J2b1a2a    |
| 130           | H14a       |
| 131           | U4b2       |
| 132           | T          |
| 133           | R0a'b      |
| 135           | R2         |
| 136           | K1b2a      |
| 137           | T1a1n      |
| 138           | X2c        |
| 139           | U4b2       |
| 140           | K1a12      |
| 141           | K1b2a      |
| 143           | U2b2       |
| 144           | T2d1b      |
| 146           | W3         |
| 148           | H15a1b     |
| 149           | H14a       |

---

|     |          |
|-----|----------|
| 150 | U4b2     |
| 151 | T2d1b    |
| 152 | T2       |
| 153 | K1a12    |
| 154 | H2a1a    |
| 155 | T2d1b    |
| 156 | U4b2     |
| 158 | W3b      |
| 159 | H15a1a1  |
| 162 | R2       |
| 166 | H5b      |
| 167 | R0a      |
| 171 | J1d1     |
| 188 | U4b2     |
| 190 | H6b2     |
| 194 | U4b2     |
| 203 | J1b1a1   |
| 204 | U4b2     |
| 212 | J1b1a1   |
| 216 | W3b      |
| 217 | K1a12a   |
| 219 | H14a     |
| 220 | U5a2a1   |
| 221 | M3a1b    |
| 225 | X2c      |
| 230 | U2b2     |
| 236 | M7c1     |
| 242 | M3a1b    |
| 300 | K1b2a    |
| 304 | X2       |
| 306 | J1b1a    |
| 307 | U4b2     |
| 312 | U4b1a1a1 |
| 320 | N1a1b1   |
| 321 | G3a1     |
| 324 | U4b1a1a1 |
| 329 | H31b     |
| 331 | X2       |
| 343 | W1c      |
| 346 | J1b1a1   |

---
