# Supplementary material for: Mitochondrial DNA genomes revealed different patterns of high-altitude adaptation in high-altitude Tajiks compared with Tibetans and Sherpas
Source: PubMed Central journal article supplement (PMC7324373; doi:10.1038/s41598-020-67519-z), 2020-06-29
Supplement: 41598_2020_67519_MOESM2_ESM.pdf [file 41598_2020_67519_MOESM2_ESM.pdf]

# **Mitochondrial DNA genomes revealed different patterns of high-altitude adaptation in high-altitude Tajiks compared with Tibetans and Sherpas**

Yu Chen<sup>1</sup>, Liang Gong<sup>1</sup>, Xinyuan Liu<sup>1</sup>, Xingshu Chen<sup>1</sup>, Shenghong Yang<sup>2#</sup>, Yongjun Luo<sup>1#</sup>

(1 Department of Military Medical Geography, Army Health Service Training Base, Third Military Medical University(Army Medical University), Chongqing 40038, China; 2 Health Department of the 957th Hospital of PLA, Ali, Tibet, China 859000)

<sup>#</sup>Corresponding author:

Prof. Shenghong Yang, Health Department of the 957th Hospital of PLA, Ali, Tibet, 859000, China.

(E-mail: kevinsh0751@163.com)

Prof. Yongjun Luo, Army Health Service Training Base, Third Military Medical University(Army Medical University), Chongqing 400038, China.

(E-mail: luo.yongjun@qq.com)







|          |      |      |      |      |      |      |       |      |      |      |      |      |
|----------|------|------|------|------|------|------|-------|------|------|------|------|------|
| F1e2     | 0.97 | 1.47 | 0.00 | 0.00 | 0.00 | 0.00 | 0.00  | 0.00 | 0.00 | 0.00 | 0.00 | 0.00 |
| F1g      | 0.00 | 1.47 | 0.00 | 0.00 | 0.00 | 0.00 | 0.00  | 0.00 | 0.00 | 0.00 | 0.00 | 0.00 |
| F2       | 0.00 | 0.00 | 0.00 | 0.00 | 0.00 | 3.70 | 0.00  | 0.00 | 0.00 | 0.00 | 0.00 | 0.00 |
| F2a      | 0.97 | 0.00 | 0.00 | 0.00 | 0.00 | 0.00 | 0.00  | 0.00 | 0.00 | 0.00 | 0.00 | 0.00 |
| F2b1     | 1.94 | 0.00 | 0.00 | 0.00 | 0.00 | 0.00 | 0.00  | 0.00 | 0.00 | 0.00 | 0.00 | 0.00 |
| F2c2     | 0.97 | 0.00 | 0.00 | 0.00 | 0.00 | 0.00 | 0.00  | 0.00 | 0.00 | 0.00 | 0.00 | 0.00 |
| F2d      | 1.94 | 0.00 | 0.00 | 0.00 | 0.00 | 0.00 | 0.00  | 0.00 | 0.00 | 0.00 | 0.00 | 0.00 |
| F2e      | 0.97 | 0.00 | 0.00 | 0.00 | 0.00 | 0.00 | 0.00  | 0.00 | 0.00 | 0.00 | 0.00 | 0.00 |
| F2h      | 0.00 | 0.00 | 0.00 | 0.00 | 0.00 | 0.00 | 0.00  | 0.00 | 0.00 | 0.00 | 1.47 | 0.00 |
| F2i      | 0.97 | 0.00 | 0.00 | 0.00 | 0.00 | 0.00 | 0.00  | 0.00 | 0.00 | 0.00 | 0.00 | 0.00 |
| F3a1     | 0.00 | 2.94 | 0.00 | 0.00 | 0.00 | 0.00 | 0.00  | 0.00 | 0.00 | 0.00 | 0.00 | 0.00 |
| F4b      | 0.97 | 0.00 | 0.00 | 0.00 | 0.00 | 0.00 | 0.00  | 0.00 | 0.00 | 0.00 | 0.00 | 0.00 |
| G1       | 0.97 | 0.00 | 0.00 | 0.00 | 0.00 | 0.00 | 0.00  | 0.00 | 0.00 | 0.00 | 0.00 | 0.00 |
| G1a1     | 0.00 | 0.00 | 0.00 | 0.00 | 0.00 | 0.00 | 4.00  | 3.49 | 0.00 | 0.00 | 0.00 | 0.00 |
| G1c2     | 0.97 | 0.00 | 0.00 | 0.00 | 0.00 | 0.00 | 0.00  | 0.00 | 0.00 | 0.00 | 0.00 | 0.00 |
| G2a1     | 0.00 | 0.00 | 0.00 | 0.00 | 0.00 | 7.41 | 0.00  | 0.00 | 0.00 | 0.00 | 2.94 | 0.00 |
| G2a1d2   | 0.00 | 0.00 | 0.00 | 1.85 | 0.00 | 0.00 | 0.00  | 0.00 | 0.00 | 0.00 | 0.00 | 0.00 |
| G2a1d2a  | 0.97 | 0.00 | 0.00 | 0.00 | 0.00 | 0.00 | 0.00  | 0.00 | 0.00 | 0.00 | 0.00 | 0.00 |
| G2a1f    | 0.97 | 0.00 | 0.00 | 0.00 | 0.00 | 0.00 | 0.00  | 0.00 | 0.00 | 0.00 | 0.00 | 0.00 |
| G2a2     | 0.00 | 1.47 | 0.00 | 3.70 | 0.00 | 0.00 | 0.00  | 0.00 | 0.00 | 0.00 | 0.00 | 0.00 |
| G2a3     | 0.00 | 0.00 | 0.00 | 0.00 | 0.00 | 3.70 | 0.00  | 0.00 | 0.00 | 0.00 | 0.00 | 0.00 |
| G2b1a2   | 0.97 | 0.00 | 0.00 | 0.00 | 0.00 | 0.00 | 0.00  | 0.00 | 0.00 | 0.00 | 0.00 | 0.00 |
| G2b1b    | 0.00 | 0.00 | 0.00 | 0.00 | 0.00 | 0.00 | 0.00  | 0.00 | 0.00 | 0.00 | 1.47 | 0.00 |
| G2b2     | 0.00 | 1.47 | 0.00 | 0.00 | 0.00 | 0.00 | 0.00  | 0.00 | 0.00 | 0.00 | 0.00 | 0.00 |
| G3a1     | 0.00 | 0.00 | 1.25 | 0.00 | 0.00 | 0.00 | 0.00  | 1.16 | 0.00 | 1.47 | 0.00 | 0.00 |
| G3a1a    | 0.00 | 0.00 | 0.00 | 0.00 | 0.00 | 0.00 | 0.00  | 0.00 | 1.32 | 1.47 | 0.00 | 0.00 |
| G3a3     | 0.00 | 0.00 | 0.00 | 0.00 | 0.00 | 3.70 | 0.00  | 0.00 | 0.00 | 0.00 | 0.00 | 0.00 |
| G3b      | 0.00 | 0.00 | 0.00 | 0.00 | 0.00 | 0.00 | 0.00  | 0.00 | 0.00 | 1.47 | 0.00 | 0.00 |
| G3b1     | 0.00 | 0.00 | 0.00 | 0.00 | 0.00 | 0.00 | 0.00  | 0.00 | 0.00 | 1.47 | 0.00 | 0.00 |
| H        | 0.00 | 0.00 | 0.00 | 1.85 | 7.14 | 0.00 | 2.00  | 2.33 | 0.00 | 0.00 | 0.00 | 9.09 |
| H10a1    | 0.00 | 0.00 | 0.00 | 0.00 | 0.00 | 0.00 | 0.00  | 0.00 | 1.32 | 0.00 | 0.00 | 0.00 |
| H13a2b2a | 0.00 | 0.00 | 0.00 | 1.85 | 0.00 | 0.00 | 0.00  | 0.00 | 0.00 | 0.00 | 0.00 | 0.00 |
| H14a     | 0.00 | 0.00 | 5.00 | 0.00 | 0.00 | 0.00 | 0.00  | 0.00 | 0.00 | 0.00 | 0.00 | 7.58 |
| H15a1a1  | 0.00 | 0.00 | 1.25 | 0.00 | 0.00 | 0.00 | 10.00 | 0.00 | 0.00 | 0.00 | 0.00 | 0.00 |



|         |      |      |      |      |      |      |      |      |      |      |      |
|---------|------|------|------|------|------|------|------|------|------|------|------|
| J1b1    | 0.00 | 0.00 | 0.00 | 3.70 | 0.00 | 0.00 | 0.00 | 0.00 | 0.00 | 0.00 | 0.00 |
| J1b1a   | 0.00 | 0.00 | 1.25 | 0.00 | 0.00 | 0.00 | 0.00 | 0.00 | 0.00 | 0.00 | 0.00 |
| J1b1a1  | 0.00 | 1.47 | 5.00 | 0.00 | 0.00 | 0.00 | 0.00 | 2.33 | 0.00 | 0.00 | 1.52 |
| J1b1b1  | 0.00 | 0.00 | 0.00 | 3.70 | 7.14 | 0.00 | 0.00 | 1.16 | 0.00 | 0.00 | 3.03 |
| J1b2    | 0.00 | 0.00 | 0.00 | 5.56 | 0.00 | 0.00 | 0.00 | 0.00 | 0.00 | 0.00 | 0.00 |
| J1b6    | 0.00 | 0.00 | 0.00 | 0.00 | 0.00 | 0.00 | 2.00 | 0.00 | 0.00 | 0.00 | 0.00 |
| J1c1b1a | 0.00 | 2.94 | 0.00 | 0.00 | 0.00 | 0.00 | 0.00 | 0.00 | 0.00 | 0.00 | 0.00 |
| J1d     | 0.00 | 0.00 | 0.00 | 0.00 | 0.00 | 0.00 | 0.00 | 1.16 | 0.00 | 0.00 | 0.00 |
| J1d1    | 0.00 | 1.47 | 1.25 | 0.00 | 0.00 | 0.00 | 0.00 | 0.00 | 0.00 | 0.00 | 3.03 |
| J1d2    | 0.00 | 0.00 | 0.00 | 0.00 | 0.00 | 3.70 | 0.00 | 0.00 | 0.00 | 0.00 | 0.00 |
| J1d6a   | 0.00 | 0.00 | 0.00 | 0.00 | 3.57 | 0.00 | 0.00 | 0.00 | 0.00 | 0.00 | 0.00 |
| J2b1a2a | 0.00 | 0.00 | 1.25 | 0.00 | 0.00 | 0.00 | 2.00 | 2.33 | 0.00 | 0.00 | 0.00 |
| K1a12   | 0.00 | 0.00 | 2.50 | 0.00 | 0.00 | 0.00 | 0.00 | 0.00 | 0.00 | 0.00 | 0.00 |
| K1a12a  | 0.00 | 2.94 | 1.25 | 0.00 | 0.00 | 0.00 | 2.00 | 3.49 | 0.00 | 0.00 | 4.55 |
| K1a2a   | 0.00 | 0.00 | 1.25 | 0.00 | 0.00 | 0.00 | 0.00 | 0.00 | 0.00 | 0.00 | 0.00 |
| K1a4i   | 0.00 | 7.35 | 0.00 | 0.00 | 0.00 | 0.00 | 0.00 | 0.00 | 0.00 | 0.00 | 0.00 |
| K1b1a1  | 0.00 | 0.00 | 0.00 | 0.00 | 0.00 | 0.00 | 0.00 | 0.00 | 0.00 | 0.00 | 1.52 |
| K1b1a1a | 0.00 | 0.00 | 0.00 | 0.00 | 0.00 | 3.70 | 0.00 | 0.00 | 0.00 | 0.00 | 0.00 |
| K1b2a   | 0.00 | 0.00 | 3.75 | 0.00 | 0.00 | 0.00 | 0.00 | 2.33 | 0.00 | 0.00 | 1.52 |
| K3      | 0.97 | 0.00 | 0.00 | 0.00 | 0.00 | 0.00 | 0.00 | 0.00 | 0.00 | 0.00 | 0.00 |
| M10a1a  | 0.97 | 0.00 | 0.00 | 0.00 | 0.00 | 0.00 | 0.00 | 0.00 | 0.00 | 0.00 | 0.00 |
| M10a1a1 | 0.97 | 0.00 | 0.00 | 0.00 | 0.00 | 0.00 | 0.00 | 0.00 | 0.00 | 0.00 | 0.00 |
| M10a1b  | 0.97 | 0.00 | 0.00 | 0.00 | 0.00 | 0.00 | 0.00 | 0.00 | 0.00 | 0.00 | 0.00 |
| M11a2   | 0.00 | 0.00 | 0.00 | 0.00 | 0.00 | 0.00 | 0.00 | 0.00 | 1.32 | 1.47 | 0.00 |
| M11b    | 0.00 | 0.00 | 0.00 | 0.00 | 3.57 | 0.00 | 0.00 | 0.00 | 0.00 | 0.00 | 0.00 |
| M11c    | 0.97 | 0.00 | 0.00 | 0.00 | 0.00 | 0.00 | 0.00 | 0.00 | 0.00 | 0.00 | 0.00 |
| M13a1b  | 0.00 | 0.00 | 0.00 | 0.00 | 0.00 | 0.00 | 0.00 | 0.00 | 0.00 | 1.47 | 0.00 |
| M13a2   | 0.00 | 0.00 | 0.00 | 0.00 | 0.00 | 0.00 | 0.00 | 0.00 | 2.63 | 5.88 | 0.00 |
| M13b2   | 0.00 | 0.00 | 0.00 | 0.00 | 0.00 | 0.00 | 0.00 | 0.00 | 0.00 | 1.47 | 0.00 |
| M30     | 0.00 | 2.94 | 0.00 | 0.00 | 0.00 | 0.00 | 0.00 | 1.16 | 0.00 | 0.00 | 1.52 |
| M30a    | 0.00 | 0.00 | 0.00 | 0.00 | 0.00 | 0.00 | 0.00 | 0.00 | 0.00 | 1.47 | 0.00 |
| M30c1   | 0.00 | 0.00 | 0.00 | 0.00 | 3.57 | 0.00 | 0.00 | 0.00 | 0.00 | 0.00 | 0.00 |
| M33a    | 0.00 | 0.00 | 0.00 | 0.00 | 7.14 | 0.00 | 0.00 | 0.00 | 0.00 | 0.00 | 0.00 |
| M35a    | 0.00 | 0.00 | 0.00 | 0.00 | 0.00 | 0.00 | 0.00 | 1.16 | 0.00 | 0.00 | 0.00 |





|              |      |      |      |      |      |      |      |      |       |      |      |
|--------------|------|------|------|------|------|------|------|------|-------|------|------|
| M9a1a1c1b1a  | 0.00 | 0.00 | 0.00 | 0.00 | 0.00 | 0.00 | 0.00 | 0.00 | 13.16 | 2.94 | 0.00 |
| M9a1a1c1b1a1 | 0.00 | 0.00 | 0.00 | 0.00 | 0.00 | 0.00 | 0.00 | 0.00 | 1.32  | 0.00 | 0.00 |
| M9a1a2       | 0.00 | 0.00 | 0.00 | 0.00 | 0.00 | 0.00 | 0.00 | 0.00 | 3.95  | 7.35 | 0.00 |
| M9a1b1       | 0.00 | 0.00 | 0.00 | 1.85 | 0.00 | 0.00 | 0.00 | 0.00 | 0.00  | 2.94 | 0.00 |
| M9a1b1c      | 0.00 | 0.00 | 0.00 | 0.00 | 0.00 | 0.00 | 0.00 | 0.00 | 0.00  | 2.94 | 0.00 |
| N10a         | 0.97 | 0.00 | 0.00 | 0.00 | 0.00 | 0.00 | 0.00 | 0.00 | 0.00  | 0.00 | 0.00 |
| N11a1        | 0.00 | 0.00 | 0.00 | 0.00 | 0.00 | 0.00 | 0.00 | 0.00 | 0.00  | 1.47 | 0.00 |
| N1a1b1       | 0.00 | 0.00 | 1.25 | 0.00 | 0.00 | 0.00 | 0.00 | 2.33 | 0.00  | 0.00 | 0.00 |
| N9a          | 0.97 | 0.00 | 0.00 | 0.00 | 0.00 | 0.00 | 0.00 | 0.00 | 0.00  | 0.00 | 0.00 |
| N9a1         | 0.00 | 2.94 | 0.00 | 0.00 | 0.00 | 0.00 | 0.00 | 0.00 | 0.00  | 0.00 | 0.00 |
| N9a2a        | 0.97 | 0.00 | 0.00 | 0.00 | 0.00 | 0.00 | 0.00 | 0.00 | 0.00  | 0.00 | 0.00 |
| N9a3         | 0.97 | 4.41 | 0.00 | 0.00 | 0.00 | 3.70 | 0.00 | 0.00 | 0.00  | 0.00 | 0.00 |
| N9a4b1       | 1.94 | 0.00 | 0.00 | 0.00 | 0.00 | 0.00 | 0.00 | 0.00 | 0.00  | 0.00 | 0.00 |
| N9a9         | 1.94 | 0.00 | 0.00 | 0.00 | 0.00 | 0.00 | 0.00 | 0.00 | 0.00  | 0.00 | 0.00 |
| R0a          | 0.00 | 0.00 | 2.50 | 0.00 | 0.00 | 0.00 | 0.00 | 0.00 | 0.00  | 0.00 | 3.03 |
| R0a`b        | 0.00 | 0.00 | 1.25 | 0.00 | 0.00 | 0.00 | 0.00 | 0.00 | 0.00  | 0.00 | 0.00 |
| R11b1a       | 0.97 | 0.00 | 0.00 | 0.00 | 0.00 | 0.00 | 0.00 | 0.00 | 0.00  | 0.00 | 0.00 |
| R11b1b       | 0.97 | 0.00 | 0.00 | 0.00 | 0.00 | 0.00 | 0.00 | 0.00 | 0.00  | 0.00 | 0.00 |
| R1a1         | 0.00 | 0.00 | 0.00 | 1.85 | 0.00 | 0.00 | 0.00 | 0.00 | 0.00  | 0.00 | 0.00 |
| R2           | 0.00 | 0.00 | 3.75 | 0.00 | 3.57 | 3.70 | 0.00 | 0.00 | 0.00  | 0.00 | 6.06 |
| R2d          | 0.00 | 0.00 | 1.25 | 0.00 | 0.00 | 0.00 | 0.00 | 0.00 | 0.00  | 0.00 | 0.00 |
| T            | 0.00 | 0.00 | 1.25 | 0.00 | 0.00 | 0.00 | 0.00 | 0.00 | 0.00  | 0.00 | 0.00 |
| T1a          | 0.00 | 0.00 | 0.00 | 0.00 | 0.00 | 0.00 | 0.00 | 0.00 | 0.00  | 0.00 | 1.52 |
| T1a1b        | 0.00 | 0.00 | 0.00 | 1.85 | 0.00 | 0.00 | 0.00 | 0.00 | 0.00  | 0.00 | 0.00 |
| T1a1b1       | 0.00 | 2.94 | 0.00 | 0.00 | 0.00 | 0.00 | 0.00 | 0.00 | 0.00  | 0.00 | 3.03 |
| T1a1n        | 0.00 | 0.00 | 3.75 | 0.00 | 0.00 | 0.00 | 6.00 | 1.16 | 0.00  | 0.00 | 3.03 |
| T2           | 0.00 | 0.00 | 1.25 | 0.00 | 3.57 | 0.00 | 2.00 | 0.00 | 0.00  | 0.00 | 0.00 |
| T2a1a        | 0.00 | 0.00 | 0.00 | 0.00 | 0.00 | 0.00 | 4.00 | 0.00 | 0.00  | 0.00 | 0.00 |
| T2a1b        | 0.00 | 0.00 | 0.00 | 0.00 | 3.57 | 0.00 | 0.00 | 0.00 | 0.00  | 0.00 | 0.00 |
| T2b34        | 0.00 | 0.00 | 0.00 | 0.00 | 0.00 | 0.00 | 0.00 | 1.16 | 0.00  | 0.00 | 0.00 |
| T2d1b        | 0.00 | 0.00 | 5.00 | 0.00 | 0.00 | 0.00 | 0.00 | 0.00 | 0.00  | 0.00 | 1.52 |
| T2d2         | 0.00 | 0.00 | 0.00 | 0.00 | 0.00 | 0.00 | 2.00 | 0.00 | 0.00  | 0.00 | 0.00 |
| T2g          | 0.00 | 2.94 | 0.00 | 0.00 | 0.00 | 0.00 | 0.00 | 0.00 | 0.00  | 0.00 | 0.00 |
| T2g1b        | 0.00 | 0.00 | 0.00 | 0.00 | 3.57 | 0.00 | 0.00 | 0.00 | 0.00  | 0.00 | 0.00 |

|          |      |      |       |      |      |      |      |      |      |      |      |       |
|----------|------|------|-------|------|------|------|------|------|------|------|------|-------|
| U1a1     | 0.00 | 0.00 | 0.00  | 1.85 | 0.00 | 0.00 | 0.00 | 0.00 | 0.00 | 0.00 | 0.00 | 0.00  |
| U1a1c1a  | 0.00 | 0.00 | 0.00  | 0.00 | 0.00 | 0.00 | 0.00 | 0.00 | 0.00 | 0.00 | 1.47 | 0.00  |
| U2a2     | 0.00 | 0.00 | 0.00  | 0.00 | 0.00 | 0.00 | 0.00 | 0.00 | 0.00 | 1.32 | 0.00 | 0.00  |
| U2b      | 0.00 | 1.47 | 0.00  | 0.00 | 0.00 | 0.00 | 0.00 | 0.00 | 0.00 | 0.00 | 0.00 | 0.00  |
| U2b1a    | 0.00 | 0.00 | 0.00  | 0.00 | 0.00 | 0.00 | 0.00 | 0.00 | 0.00 | 3.95 | 0.00 | 0.00  |
| U2b2     | 0.00 | 0.00 | 3.75  | 0.00 | 0.00 | 0.00 | 0.00 | 0.00 | 5.81 | 0.00 | 0.00 | 1.52  |
| U2c1b    | 0.00 | 0.00 | 0.00  | 0.00 | 0.00 | 3.70 | 0.00 | 0.00 | 0.00 | 0.00 | 0.00 | 0.00  |
| U2e1     | 0.00 | 0.00 | 0.00  | 0.00 | 0.00 | 0.00 | 2.00 | 0.00 | 0.00 | 0.00 | 0.00 | 0.00  |
| U2e1h    | 0.00 | 0.00 | 0.00  | 1.85 | 0.00 | 0.00 | 8.00 | 2.33 | 0.00 | 0.00 | 0.00 | 1.52  |
| U2e3a    | 0.00 | 0.00 | 0.00  | 0.00 | 0.00 | 0.00 | 0.00 | 1.16 | 0.00 | 0.00 | 0.00 | 0.00  |
| U3       | 0.00 | 0.00 | 0.00  | 0.00 | 0.00 | 0.00 | 0.00 | 1.16 | 0.00 | 0.00 | 0.00 | 0.00  |
| U4a1     | 0.00 | 1.47 | 0.00  | 0.00 | 0.00 | 0.00 | 0.00 | 2.33 | 0.00 | 0.00 | 0.00 | 0.00  |
| U4a2     | 0.00 | 0.00 | 0.00  | 0.00 | 0.00 | 3.70 | 0.00 | 0.00 | 0.00 | 0.00 | 0.00 | 0.00  |
| U4b      | 0.00 | 0.00 | 0.00  | 5.56 | 0.00 | 0.00 | 0.00 | 0.00 | 0.00 | 0.00 | 0.00 | 0.00  |
| U4b1a1a1 | 0.00 | 0.00 | 2.50  | 0.00 | 0.00 | 0.00 | 0.00 | 1.16 | 0.00 | 0.00 | 0.00 | 0.00  |
| U4b1a4   | 0.00 | 0.00 | 0.00  | 0.00 | 3.57 | 0.00 | 0.00 | 0.00 | 0.00 | 0.00 | 0.00 | 0.00  |
| U4b2     | 0.00 | 0.00 | 10.00 | 0.00 | 0.00 | 0.00 | 0.00 | 3.49 | 0.00 | 0.00 | 0.00 | 3.03  |
| U4c1     | 0.00 | 0.00 | 0.00  | 0.00 | 3.57 | 0.00 | 0.00 | 0.00 | 0.00 | 0.00 | 0.00 | 0.00  |
| U5a1a1   | 0.00 | 0.00 | 1.25  | 0.00 | 0.00 | 0.00 | 0.00 | 1.16 | 0.00 | 0.00 | 0.00 | 0.00  |
| U5a1b    | 0.00 | 1.47 | 0.00  | 0.00 | 0.00 | 0.00 | 0.00 | 1.16 | 0.00 | 0.00 | 0.00 | 0.00  |
| U5a1b1   | 0.00 | 0.00 | 0.00  | 1.85 | 0.00 | 0.00 | 0.00 | 0.00 | 0.00 | 0.00 | 0.00 | 0.00  |
| U5a1d2b  | 0.00 | 0.00 | 0.00  | 0.00 | 0.00 | 0.00 | 0.00 | 1.16 | 0.00 | 0.00 | 0.00 | 0.00  |
| U5a1g    | 0.00 | 1.47 | 0.00  | 0.00 | 0.00 | 0.00 | 0.00 | 0.00 | 0.00 | 0.00 | 0.00 | 0.00  |
| U5a2a1   | 0.00 | 1.47 | 1.25  | 1.85 | 0.00 | 0.00 | 2.00 | 1.16 | 0.00 | 0.00 | 0.00 | 0.00  |
| U5a2b    | 0.00 | 0.00 | 2.50  | 0.00 | 0.00 | 0.00 | 0.00 | 1.16 | 0.00 | 0.00 | 0.00 | 1.52  |
| U5b2     | 0.00 | 1.47 | 0.00  | 0.00 | 0.00 | 0.00 | 0.00 | 0.00 | 0.00 | 0.00 | 0.00 | 0.00  |
| U5b2a1b  | 0.00 | 0.00 | 0.00  | 0.00 | 0.00 | 0.00 | 0.00 | 1.16 | 0.00 | 0.00 | 0.00 | 0.00  |
| U7a3a    | 0.00 | 0.00 | 0.00  | 0.00 | 0.00 | 0.00 | 0.00 | 1.16 | 0.00 | 0.00 | 0.00 | 3.03  |
| U7a3b    | 0.00 | 0.00 | 0.00  | 0.00 | 0.00 | 0.00 | 0.00 | 1.16 | 0.00 | 0.00 | 0.00 | 0.00  |
| V1a1     | 0.00 | 0.00 | 0.00  | 1.85 | 0.00 | 0.00 | 0.00 | 0.00 | 0.00 | 0.00 | 0.00 | 0.00  |
| W        | 0.00 | 0.00 | 0.00  | 0.00 | 0.00 | 0.00 | 0.00 | 0.00 | 1.32 | 0.00 | 0.00 | 0.00  |
| W1c      | 0.00 | 0.00 | 1.25  | 0.00 | 0.00 | 0.00 | 0.00 | 0.00 | 0.00 | 0.00 | 0.00 | 0.00  |
| W3       | 0.00 | 0.00 | 1.25  | 0.00 | 0.00 | 0.00 | 0.00 | 0.00 | 0.00 | 0.00 | 0.00 | 0.00  |
| W3b      | 0.00 | 0.00 | 2.50  | 0.00 | 0.00 | 0.00 | 4.00 | 0.00 | 0.00 | 0.00 | 0.00 | 12.12 |
