# Supplementary material for: Mitochondrial DNA genomes revealed different patterns of high-altitude adaptation in high-altitude Tajiks compared with Tibetans and Sherpas
Source: PubMed Central journal article supplement (PMC7324373; doi:10.1038/s41598-020-67519-z), 2020-06-29
Supplement: 41598_2020_67519_MOESM3_ESM.pdf [file 41598_2020_67519_MOESM3_ESM.pdf]

# **Mitochondrial DNA genomes revealed different patterns of high-altitude adaptation in high-altitude Tajiks compared with Tibetans and Sherpas**

Yu Chen<sup>1</sup>, Liang Gong<sup>1</sup>, Xinyuan Liu<sup>1</sup>, Xingshu Chen<sup>1</sup>, Shenghong Yang<sup>2#</sup>, Yongjun Luo<sup>1#</sup>

(1 Department of Military Medical Geography, Army Health Service Training Base, Third Military Medical University(Army Medical University), Chongqing 40038, China; 2 Health Department of the 957th Hospital of PLA, Ali, Tibet, China 859000)

#Corresponding author:

Prof. Shenghong Yang, Health Department of the 957th Hospital of PLA, Ali, Tibet, 859000, China.

(E-mail: kevinsh0751@163.com)

Prof. Yongjun Luo, Army Health Service Training Base, Third Military Medical University(Army Medical University), Chongqing 400038, China.

(E-mail: luo.yongjun@qq.com)

Table S3 Results of p values between 0.025 and 0.0000001 in comparison of mtDNA genome between Tibetan and HA-Tajik

| Alleles | Amino acid change | Regions | Tibetan  |              | HA-Tajik |              | $\chi^2$ | p values |
|---------|-------------------|---------|----------|--------------|----------|--------------|----------|----------|
|         |                   |         | Variants | non-variants | Variants | non-variants |          |          |
| 3594T   | No                | ND1     | 16       | 52           | 40       | 40           | 10.95    | 0.001    |
| 4104G   | No                | ND1     | 16       | 52           | 40       | 40           | 10.95    | 0.001    |
| 4216C   | Yes               | ND1     | 0        | 68           | 20       | 60           | 19.66    | 0.000009 |
| 4561C   | Yes               | ND2     | 12       | 56           | 0        | 80           | 15.36    | 0.000089 |
| 4646C   | No                | ND2     | 0        | 68           | 10       | 70           | 7.24     | 0.007    |
| 4769G   | Yes               | ND2     | 52       | 16           | 42       | 38           | 9.11     | 0.003    |
| 7028T   | No                | COX1    | 52       | 16           | 43       | 37           | 8.26     | 0.004    |
| 7146G   | Yes               | COX1    | 16       | 52           | 40       | 40           | 10.95    | 0.001    |
| 7256T   | No                | COX1    | 17       | 51           | 40       | 40           | 9.7      | 0.002    |
| 7664A   | Yes               | COX2    | 12       | 56           | 0        | 80           | 15.36    | 0.000089 |
| 8149G   | No                | COX2    | 12       | 56           | 0        | 80           | 15.36    | 0.000089 |
| 8468T   | No                | ATP8    | 16       | 52           | 40       | 40           | 10.95    | 0.001    |
| 8655T   | No                | ATP6    | 16       | 52           | 40       | 40           | 10.95    | 0.001    |
| 8860G   | Yes               | ATP6    | 52       | 16           | 40       | 40           | 10.95    | 0.001    |
| 10664T  | No                | ND4L    | 16       | 52           | 40       | 40           | 10.95    | 0.001    |
| 10688A  | No                | ND4L    | 16       | 52           | 40       | 40           | 10.95    | 0.001    |
| 10810C  | No                | ND4     | 16       | 52           | 40       | 40           | 10.95    | 0.001    |
| 10915C  | No                | ND4     | 16       | 52           | 40       | 40           | 10.95    | 0.001    |
| 11251G  | No                | ND4     | 0        | 68           | 17       | 63           | 16.33    | 0.000053 |
| 11467G  | No                | ND4     | 1        | 67           | 23       | 57           | 20.13    | 0.000007 |
| 11914A  | No                | ND4     | 18       | 50           | 41       | 39           | 9.42     | 0.002    |
| 12372A  | No                | ND5     | 1        | 67           | 24       | 56           | 21.31    | 0.000004 |
| 13105G  | Yes               | ND5     | 16       | 52           | 40       | 40           | 10.95    | 0.001    |
| 13276G  | Yes               | ND5     | 16       | 52           | 40       | 40           | 10.95    | 0.001    |
| 13506T  | No                | ND5     | 16       | 52           | 40       | 40           | 10.95    | 0.001    |
| 13650T  | No                | ND5     | 16       | 52           | 40       | 40           | 10.95    | 0.001    |
| 14766T  | Yes               | CYTB    | 52       | 16           | 43       | 37           | 8.26     | 0.004    |
| 15326G  | Yes               | CYTB    | 51       | 17           | 40       | 40           | 9.7      | 0.002    |
| 15452A  | Yes               | CYTB    | 0        | 68           | 16       | 64           | 15.25    | 0.000094 |
| 15510G  | Yes               | CYTB    | 12       | 56           | 0        | 80           | 15.36    | 0.000089 |
| 15607G  | No                | CYTB    | 0        | 68           | 9        | 71           | 6.3      | 0.012    |
| 15721C  | No                | CYTB    | 12       | 56           | 0        | 80           | 15.36    | 0.000089 |
