# Supplementary material for: Mitochondrial DNA genomes revealed different patterns of high-altitude adaptation in high-altitude Tajiks compared with Tibetans and Sherpas
Source: PubMed Central journal article supplement (PMC7324373; doi:10.1038/s41598-020-67519-z), 2020-06-29
Supplement: 41598_2020_67519_MOESM4_ESM.pdf [file 41598_2020_67519_MOESM4_ESM.pdf]

# **Mitochondrial DNA genomes revealed different patterns of high-altitude adaptation in high-altitude Tajiks compared with Tibetans and Sherpas**

Yu Chen<sup>1</sup>, Liang Gong<sup>1</sup>, Xinyuan Liu<sup>1</sup>, Xingshu Chen<sup>1</sup>, Shenghong Yang<sup>2#</sup>, Yongjun Luo<sup>1#</sup>

(1 Department of Military Medical Geography, Army Health Service Training Base, Third Military Medical University(Army Medical University), Chongqing 40038, China; 2 Health Department of the 957th Hospital of PLA, Ali, Tibet, China 859000)

#Corresponding author:

Prof. Shenghong Yang, Health Department of the 957th Hospital of PLA, Ali, Tibet, 859000, China.

(E-mail: kevinsh0751@163.com)

Prof. Yongjun Luo, Army Health Service Training Base, Third Military Medical University(Army Medical University), Chongqing 400038, China.

(E-mail: luo.yongjun@qq.com)

Table S4 Results of p values between 0.025 and 0.0000001 in comparison of mtDNA genome between Sherpa and HA-Tajik

| Alleles | Amino acid change | Regions | Sherpa   |              | HA-Tajik |              | $\chi^2$ | p values |
|---------|-------------------|---------|----------|--------------|----------|--------------|----------|----------|
|         |                   |         | variants | non-variants | variants | non-variants |          |          |
| 3394C   | No                | ND1     | 14       | 62           | 0        | 80           | 16.19    | 0.000057 |
| 3552A   | No                | ND1     | 14       | 62           | 1        | 79           | 13.22    | 0.000277 |
| 3745A   | Yes               | ND1     | 11       | 65           | 2        | 78           | 7.32     | 0.007    |
| 4248C   | No                | ND1     | 20       | 56           | 4        | 76           | 13.6     | 0.000226 |
| 4491A   | Yes               | ND2     | 14       | 62           | 0        | 80           | 16.19    | 0.000057 |
| 4646C   | No                | ND2     | 0        | 76           | 10       | 70           | 8.17     | 0.004    |
| 4696C   | Yes               | ND2     | 14       | 62           | 0        | 80           | 16.19    | 0.000057 |
| 4715G   | No                | ND2     | 14       | 62           | 1        | 79           | 13.22    | 0.000277 |
| 4824G   | Yes               | ND2     | 20       | 56           | 0        | 80           | 24.15    | 0.000001 |
| 4883T   | No                | ND2     | 8        | 68           | 0        | 80           | 6.85     | 0.009    |
| 4917G   | Yes               | ND2     | 0        | 76           | 9        | 71           | 7.12     | 0.008    |
| 5178A   | Yes               | ND2     | 8        | 68           | 0        | 80           | 6.85     | 0.009    |
| 5460A   | Yes               | ND2     | 1        | 75           | 12       | 68           | 9.55     | 0.002    |
| 5999C   | No                | COX1    | 0        | 76           | 10       | 70           | 8.17     | 0.004    |
| 6026A   | No                | COX1    | 14       | 62           | 1        | 79           | 13.22    | 0.000277 |
| 6047G   | No                | COX1    | 0        | 76           | 10       | 70           | 8.17     | 0.004    |
| 7142C   | No                | COX1    | 11       | 65           | 0        | 80           | 12.46    | 0.000416 |
| 7196A   | No                | COX1    | 14       | 62           | 1        | 79           | 13.22    | 0.000277 |
| 7697A   | Yes               | COX2    | 11       | 65           | 0        | 80           | 12.46    | 0.000416 |
| 7705C   | No                | COX2    | 0        | 76           | 10       | 70           | 8.17     | 0.004    |
| 8459G   | No                | ATP8    | 14       | 62           | 0        | 80           | 16.19    | 0.000057 |
| 8584A   | Yes               | ATP6    | 14       | 62           | 1        | 79           | 13.22    | 0.000277 |
| 8794T   | Yes               | ATP6    | 20       | 56           | 0        | 80           | 24.15    | 0.000001 |
| 9052G   | Yes               | ATP6    | 14       | 62           | 0        | 80           | 16.19    | 0.000057 |
| 9242G   | No                | COX2    | 11       | 65           | 0        | 80           | 12.46    | 0.000416 |
| 9545G   | No                | COX2    | 16       | 60           | 1        | 79           | 15.74    | 0.000073 |
| 10304C  | No                | ND3     | 14       | 62           | 0        | 80           | 16.19    | 0.000057 |
| 11467G  | No                | ND4     | 4        | 72           | 23       | 57           | 15.02    | 0.000106 |
| 11914A  | No                | ND4     | 15       | 61           | 41       | 39           | 16.82    | 0.000041 |
| 11969A  | Yes               | ND4     | 15       | 61           | 1        | 79           | 14.47    | 0.000142 |
| 12372A  | No                | ND5     | 4        | 72           | 24       | 56           | 16.19    | 0.000057 |
| 12624C  | No                | ND5     | 14       | 62           | 0        | 80           | 16.19    | 0.000057 |
| 12672G  | No                | ND5     | 14       | 62           | 1        | 79           | 13.22    | 0.000277 |
| 13111C  | No                | ND5     | 14       | 62           | 0        | 80           | 16.19    | 0.000057 |
| 13263G  | No                | ND5     | 14       | 62           | 1        | 79           | 13.22    | 0.000277 |
| 13563G  | No                | ND5     | 11       | 65           | 0        | 80           | 12.46    | 0.000416 |
| 13708A  | Yes               | ND5     | 3        | 73           | 14       | 66           | 7.37     | 0.007    |
| 14308C  | No                | ND6     | 14       | 62           | 0        | 80           | 16.19    | 0.000057 |
| 14318C  | Yes               | ND6     | 14       | 62           | 1        | 79           | 13.22    | 0.000277 |

|        |     |      |    |    |    |    |       |          |
|--------|-----|------|----|----|----|----|-------|----------|
| 14417G | Yes | ND6  | 10 | 66 | 0  | 80 | 9.16  | 0.002    |
| 15204C | Yes | CYTB | 14 | 62 | 1  | 79 | 13.22 | 0.000277 |
| 15452A | Yes | CYTB | 0  | 76 | 16 | 64 | 16.94 | 0.000039 |
| 15487T | No  | CYTB | 15 | 61 | 1  | 79 | 14.47 | 0.000142 |

---
