# Supplementary material for: Mitochondrial DNA genomes revealed different patterns of high-altitude adaptation in high-altitude Tajiks compared with Tibetans and Sherpas
Source: PubMed Central journal article supplement (PMC7324373; doi:10.1038/s41598-020-67519-z), 2020-06-29
Supplement: 41598_2020_67519_MOESM5_ESM.pdf [file 41598_2020_67519_MOESM5_ESM.pdf]

# **Mitochondrial DNA genomes revealed different patterns of high-altitude adaptation in high-altitude Tajiks compared with Tibetans and Sherpas**

Yu Chen<sup>1</sup>, Liang Gong<sup>1</sup>, Xinyuan Liu<sup>1</sup>, Xingshu Chen<sup>1</sup>, Shenghong Yang<sup>2#</sup>, Yongjun Luo<sup>1#</sup>

(1 Department of Military Medical Geography, Army Health Service Training Base, Third Military Medical University(Army Medical University), Chongqing 40038, China; 2 Health Department of the 957th Hospital of PLA, Ali, Tibet, China 859000)

#Corresponding author:

Prof. Shenghong Yang, Health Department of the 957th Hospital of PLA, Ali, Tibet, 859000, China.

(E-mail: kevinsh0751@163.com)

Prof. Yongjun Luo, Army Health Service Training Base, Third Military Medical University(Army Medical University), Chongqing 400038, China.

(E-mail: luo.yongjun@qq.com)

Table S5 Detailed information of amplification for whole mtDNA genome

| No | Primer sequences (5'-3')                              | Regions     | Annealing temperature(°C) | Product size (bp) |
|----|-------------------------------------------------------|-------------|---------------------------|-------------------|
| 1  | F:AACCAAACCCCAAAGACACC<br>R:GACTCTAGAATAGGATTGCGC     | 569-2941    | 60                        | 2372              |
| 2  | F:GTCCTAAACTACCAAACCTGC<br>R:GTGTTAGTCATGTTAGCTTG     | 2797-5193   | 60                        | 2396              |
| 3  | F:AGCAGTTCTACCGTACAACC<br>R: TTTGAAAAAGTCATGGAGGCC    | 5061-7497   | 60                        | 2436              |
| 4  | F: :GATTTGAGAAGCCTTCGCTTC<br>R: GCCAATAATGACGTGAAGTCC | 7336-9819   | 60                        | 2483              |
| 5  | F:TCCCACTCCTAAACACATCC<br>R: AAACCCGGTAATGATGTCGG     | 9611-12111  | 60                        | 2500              |
| 6  | F:GCCCACGGGCTTACATC<br>R: GATTGTTAGCGGTGTGGTCG        | 11727-14159 | 60                        | 2432              |
| 7  | F:AATCTCCACCTCCATCATCACC<br>R: ACTGGTTGTCCTCCGATTCAGG | 14046-15774 | 60                        | 1728              |
| 8  | F:TTCGCCTACACAATTCTCCG<br>R: TTTATGGGGTGATGTGAGCC     | 15591-626   | 60                        | 1604              |

PCR was performed with a total reaction volume of 20 µl containing 10-50 ng of genomic DNA, 2.0 µl of 10×PCR mix (Dongsheng Bio Inc., Guangzhou, China), 1 µl of each primer (10mM), and 7 µl of ultrapure water. The PCR was carried out in a PTC-200 DNA Engine thermal cycler (Bio-Rad, Hercules, CA, USA) with a protocol of 94°C for 3 minutes; 35 cycles of 30 seconds at 94°C, 30 seconds at 60°C and 3 minutes at 72°C; and a final hold at 72°C for 10 minutes.
