# Supplementary material for: Mitochondrial DNA genomes revealed different patterns of high-altitude adaptation in high-altitude Tajiks compared with Tibetans and Sherpas
Source: PubMed Central journal article supplement (PMC7324373; doi:10.1038/s41598-020-67519-z), 2020-06-29
Supplement: 41598_2020_67519_MOESM6_ESM.pdf [file 41598_2020_67519_MOESM6_ESM.pdf]

# **Mitochondrial DNA genomes revealed different patterns of high-altitude adaptation in high-altitude Tajiks compared with Tibetans and Sherpas**

Yu Chen<sup>1</sup>, Liang Gong<sup>1</sup>, Xinyuan Liu<sup>1</sup>, Xingshu Chen<sup>1</sup>, Shenghong Yang<sup>2#</sup>, Yongjun Luo<sup>1#</sup>

(1 Department of Military Medical Geography, Army Health Service Training Base, Third Military Medical University(Army Medical University), Chongqing 40038, China; 2 Health Department of the 957th Hospital of PLA, Ali, Tibet, China 859000)

#Corresponding author:

Prof. Shenghong Yang, Health Department of the 957th Hospital of PLA, Ali, Tibet, 859000, China.

(E-mail: kevinsh0751@163.com)

Prof. Yongjun Luo, Army Health Service Training Base, Third Military Medical University(Army Medical University), Chongqing 400038, China.

(E-mail: luo.yongjun@qq.com)

Table S6 Sequencing primers of whole mtDNA genome

| No | 5 ' position | Primer sequence(5'-3')   |
|----|--------------|--------------------------|
| 1  | 569          | F:AACCAAACCCCAAAGACACC   |
| 2  | 626          | F:TTTATGGGGTGATGTGAGCC   |
| 3  | 1305         | F:GTAAGCGCAAGTACCCACG    |
| 4  | 2070         | F:AATTTGCCACAGAACCCTC    |
| 5  | 2797         | F:GTCCTAAACTACCAAACCTGC  |
| 6  | 3568         | F:CGCTCTTCTACTATGAACCC   |
| 7  | 4322         | F:ATAATAGGAGCTTAAACCCCC  |
| 8  | 5061         | F:AGCAGTTCTACCGTACAACC   |
| 9  | 5828         | F:GAAAATCACCTCGGAGCTGG   |
| 10 | 6563         | F:ACCTCAACACCACCTTCTTC   |
| 11 | 7336         | F:GATTTGAGAAGCCTTCGCTTC  |
| 12 | 8080         | F:TCTTGCACTCATGAGCTGTC   |
| 13 | 8815         | F:CTCATTTACACCAACCACCC   |
| 14 | 9611         | F:TCCCACTCCTAAACACATCC   |
| 15 | 10380        | F:TCTGGCCTATGAGTGACTAC   |
| 16 | 11107        | R:TTCACAGCCACAGAACTAATC  |
| 17 | 11381        | R:AAGTGGAGTCCGTAAGAGG    |
| 18 | 12862        | R:AAACCGATATCGCCGATACG   |
| 19 | 13627        | F:AAGCGAGGTTGACCTGTTAG   |
| 20 | 14046        | R:AATCTCCACCTCCATCATCACC |
| 21 | 15774        | F:ACTGGTTGTCTCCGATTCAGG  |
| 22 | 15591        | R:TTCGCCTACACAATTCTCCG   |
